# Supplementary material
Source: PubMed Central journal article supplement (PMC1352170)
Supplement: NIHMS4865-supplement-sup1.pdf [file NIHMS4865-supplement-sup1.pdf]

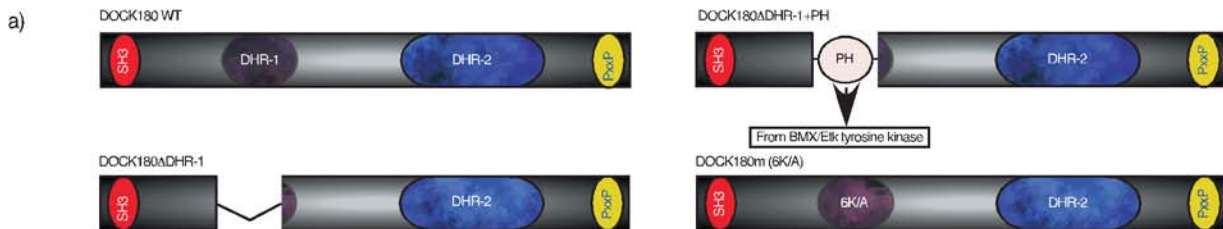

b)

|               |     |                     |                   |                       |    |
|---------------|-----|---------------------|-------------------|-----------------------|----|
|               |     | β1                  | CBR1              | β2                    |    |
| MBC-DHR-1     | 1   | GDVRNDLYLTICSGEFARI | AKTSEKNVEVSVCVANE | QGYLMPGVLSIG--        |    |
| CED-5-DHR-1   | 1   | EDSRNEMYITLMQAEELS  | --GKSSDRNIPEARLHV | VESNGHVMENVFETISV     |    |
| DOCK180-DHR-1 | 1   | GDVRNDIYVTLVQGFDF   | KGSKTTAKNVEVTVSVY | DEDEGKRLEHVIFPPG--    |    |
| DOCK2-DHR-1   | 1   | GDVRNDIYITLLQGFDF   | KYNTQORNVEVIMCVCA | EDEGKTLPNATCVG--      |    |
| DOCK5-DHR-1   | 1   | GDVRNDIYVTLIHGFDF   | KGKKTTPKNVEVTVSV  | FDEEGNLEKATHPG--      |    |
| DOCK3-DHR-1   | 1   | GDTRNDLYLTLEKGFDF   | ERGKSVQKNIEVTMYV  | LYADGETLKDCISLG--     |    |
| DOCK4-DHR-1   | 1   | GEMRNDLYITIERGEFE   | KGKSVARNVEVTMFI   | VDSSGQTLKDFISFG--     |    |
| consensus     | 1   | ...***...*          | ***...*           | ***...*               |    |
|               |     | β3                  | CBR2              | β4                    | β5 |
| MBC-DHR-1     | 49  | AGHQPIDEYKSVVYHDD   | RPKWQETFKIHVPIED  | FKQCHLRFVLRHSSN       |    |
| CED-5-DHR-1   | 49  | TGSQLSTVYKSIIVVY    | HDTKPMWTEPIKIAL   | PSCASHDVYLRILFY       |    |
| DOCK180-DHR-1 | 49  | AGDEAISEYKSVIYYQ    | VKQPRWFETVVKVAI   | PIEDVNRSHLRFTR        |    |
| DOCK2-DHR-1   | 49  | AGDKPMNEYRSVVYQ     | VKQPRWMEVTKVAV    | PIEDMQRHHLRFM         |    |
| DOCK5-DHR-1   | 49  | AGYEGVSEYKSVVYQ     | VKQPCWYETVVKVFI   | AIEEVTRCHIRFT         |    |
| DOCK3-DHR-1   | 49  | SGEPNRSYVHSFVLY     | HNSPRWGETIKLPI    | IPIDRFRGSHLRF         |    |
| DOCK4-DHR-1   | 49  | SGEPPASEYHSFVLY     | HNSPRWSELLKLP     | IPVDKFRGAHFR          |    |
| consensus     | 49  | ...***...*          | ***...*           | ***...*               |    |
|               |     | β6                  | β7                |                       |    |
| MBC-DHR-1     | 99  | EQ-----KDRTEK-      | PFGLAYVRLMQANG    | TTITOGQHILAVYKID--    |    |
| CED-5-DHR-1   | 99  | D-----KPKPEKGP      | FATAHVQLIR-SS     | ALLCDGEHDLAVYKIDNP    |    |
| DOCK180-DHR-1 | 99  | DS-----KDKSEK-      | IFALAFVKLMRYD     | GGTTLRDGEHDLIVYKAE    |    |
| DOCK2-DHR-1   | 99  | ES-----KDKGEK-      | NFAMSYYVKLMK      | EDGTTLHDGFHDLVVLKGD-- |    |
| DOCK5-DHR-1   | 99  | ESQAGVSVFSARDK      | SER-AFGVAFVKLM    | NADGTTLODGRHDLVYKGD-- |    |
| DOCK3-DHR-1   | 98  | -----KDKGEKLF       | GFASFPLMRDD       | GGTTLSDDIHELIVYKCD    |    |
| DOCK4-DHR-1   | 98  | -----KEKGEKLF       | GFSEVPLMQE        | DGRTLPDGTHELIVHKKCEE- |    |
| consensus     | 98  | ...***...*          | ***...*           | ***...*               |    |
|               |     | β8                  |                   |                       |    |
| MBC-DHR-1     | 137 | HKKYDKTVANCYLEL     | PATVAEDLQG----    | AKPS--IGGLTLLPKD      |    |
| CED-5-DHR-1   | 138 | GSHFDES-NVHYMNL     | PDTRRTLKESIG--    | SAKP-HSQGFLSDK        |    |
| DOCK180-DHR-1 | 137 | AKKLED--AATYLSL     | SPSTKAELEEKGHS    | AATGKSMQSLG           |    |
| DOCK2-DHR-1   | 137 | SKKMED--ASAYLTL     | PSYRHHVENK        | GATLSRSSSVGL          |    |
| DOCK5-DHR-1   | 146 | NKKMED--AKYYLTL     | PGTKAELEEKELQ     | ASKNPSVFTPSK          |    |
| DOCK3-DHR-1   | 136 | NSTFNN--HALYLG      | LPCCKEDYNGC----   | PNIP--SSLIFORS        |    |
| DOCK4-DHR-1   | 136 | NTNLQD--TTRYLKL     | PFSKGIPLG----     | N--NNQAMKAT           |    |
| consensus     | 151 | .....*              | ***...*           | .....*                |    |
| MBC-DHR-1     | 180 | VNLCSSTKLTQSVS      | LLGLLNWSAHKET     | LEQSNALSTVPGE---      |    |
| CED-5-DHR-1   | 184 | THSCSSMLTQNEH       | LLNVLNRVNCVNL     | TSSSLVALAQPIG         |    |
| DOCK180-DHR-1 | 185 | TLVCSSTKLTQNV       | DLLGLLKWRSNT      | SLLQQNLRQLMK          |    |
| DOCK2-DHR-1   | 185 | TLVCSSTKLTQNV       | GLLGLLKWMPQL      | LOENLEKLVKIDG         |    |
| DOCK5-DHR-1   | 194 | TLVCSSTKLTQNV       | DLGLLNWSNSQNI     | KHNKLLMEVDG---        |    |
| DOCK3-DHR-1   | 178 | TQLSSTKLTQNV        | DLGLLKWKA         | FPDRIMDILGRL          |    |
| DOCK4-DHR-1   | 174 | SFLCSSTKLTQNG       | MDLLKWRTHPKIT     | GCCLSKLKEIDGS---      |    |
| consensus     | 201 | .....*              | ***...*           | .....*                |    |
| MBC-DHR-1     | 227 | DILDALFNIL          |                   |                       |    |
| CED-5-DHR-1   | 234 | HILDALFEIW          |                   |                       |    |
| DOCK180-DHR-1 | 232 | DTLDALFNIM          |                   |                       |    |
| DOCK2-DHR-1   | 232 | DTLDALFNIM          |                   |                       |    |
| DOCK5-DHR-1   | 241 | DTLDALFNIM          |                   |                       |    |
| DOCK3-DHR-1   | 225 | DILDTLFVIL          |                   |                       |    |
| DOCK4-DHR-1   | 221 | DTLDTLFGIL          |                   |                       |    |
| consensus     | 251 | .....*              |                   |                       |    |

Supplementary information, Figure S1.
