# Supplementary material
Source: PubMed Central journal article supplement (PMC1352170)

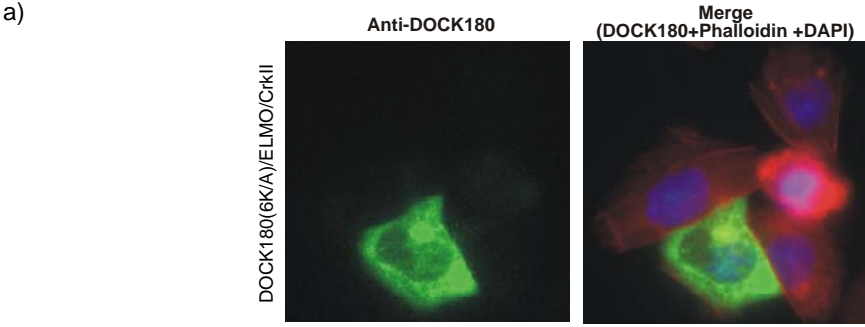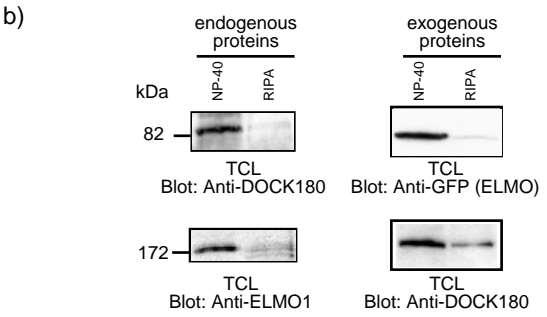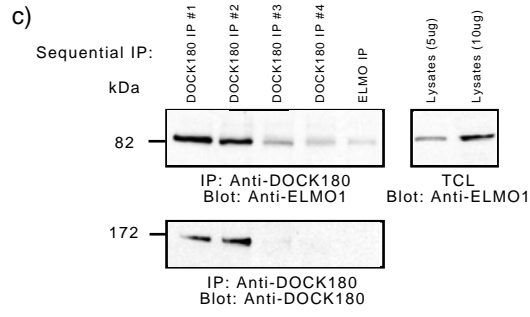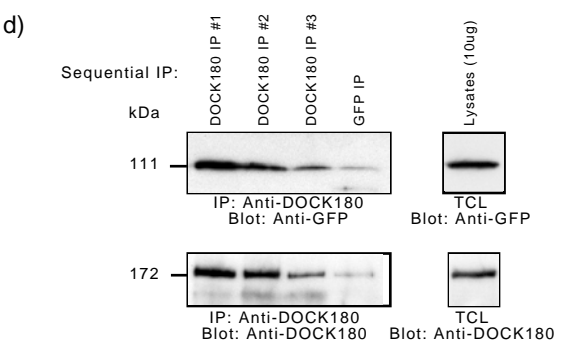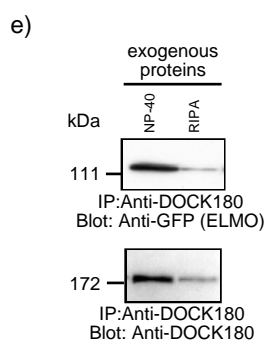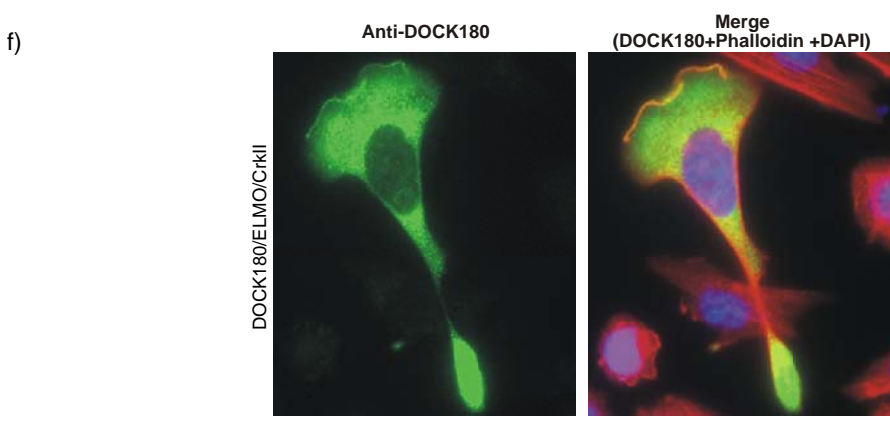

Supplementary Information Figure S2.

Supplement: NIHMS4865-supplement-sup2.pdf [file NIHMS4865-supplement-sup2.pdf]

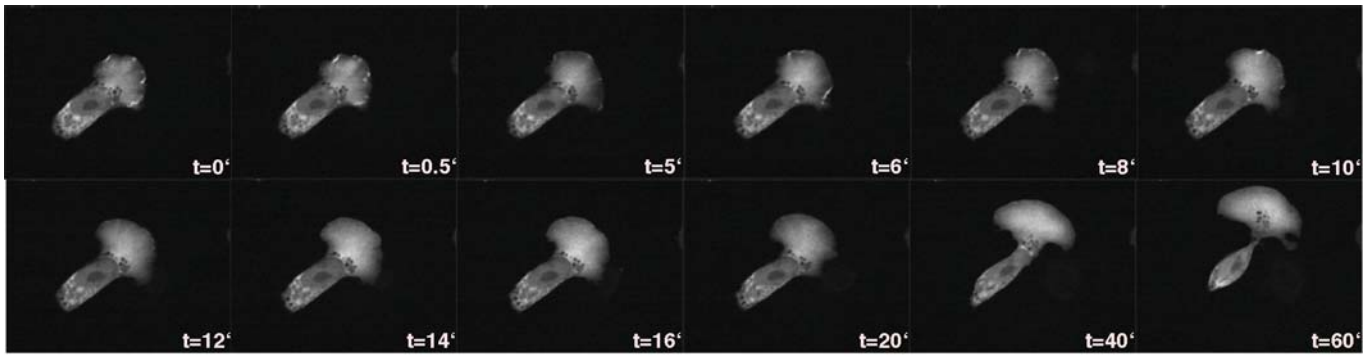

Time lapse, GFP images (ELMO1)

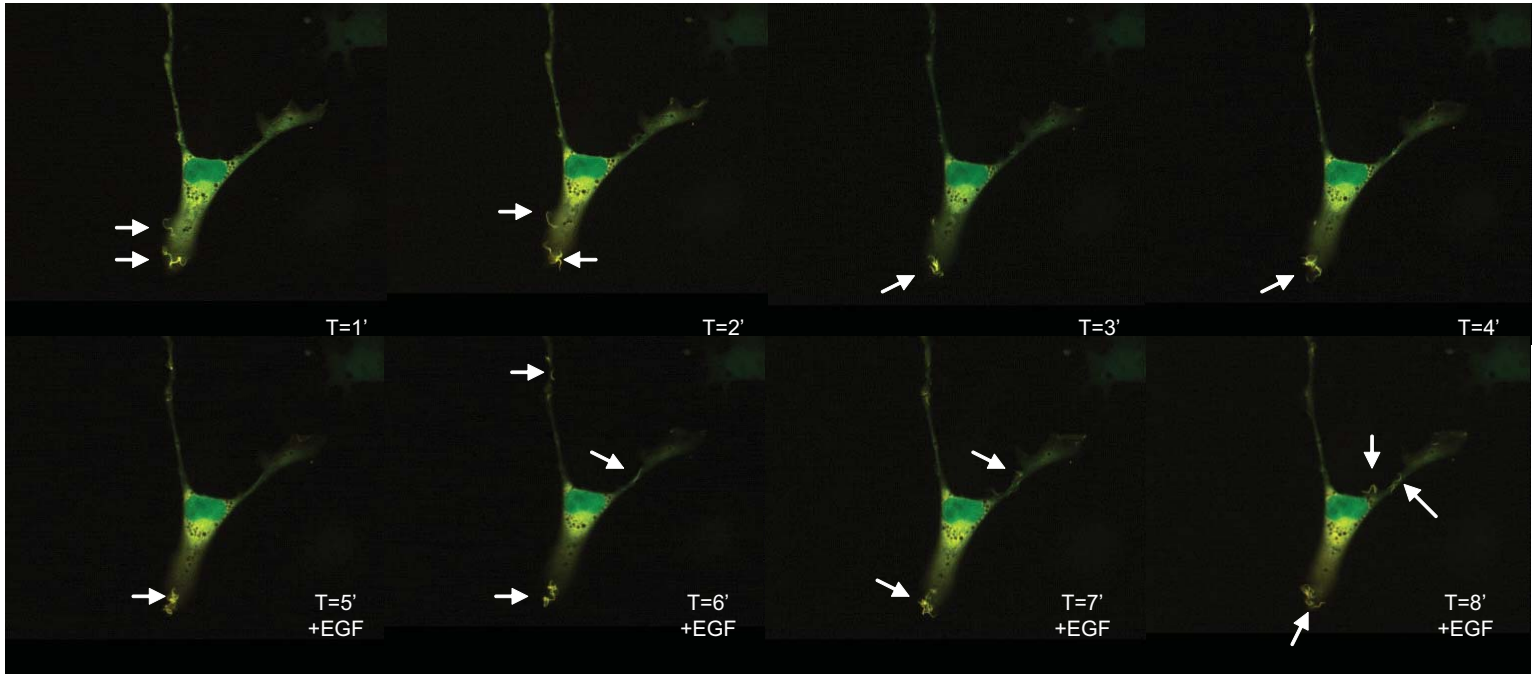

Time lapse, merged images of GFP (BTK PH domain) and RFP (ELMO-1)

Supplement: NIHMS4865-supplement-sup3.pdf [file NIHMS4865-supplement-sup3.pdf]

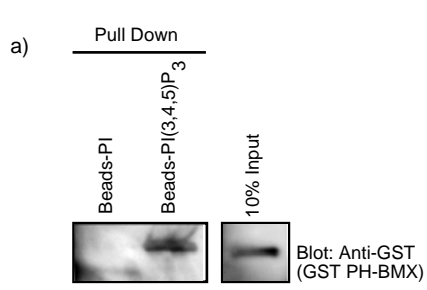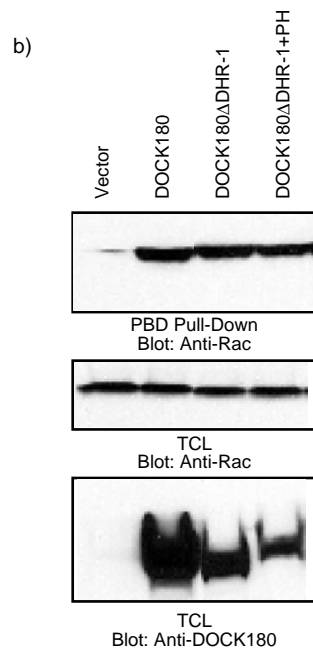

c)

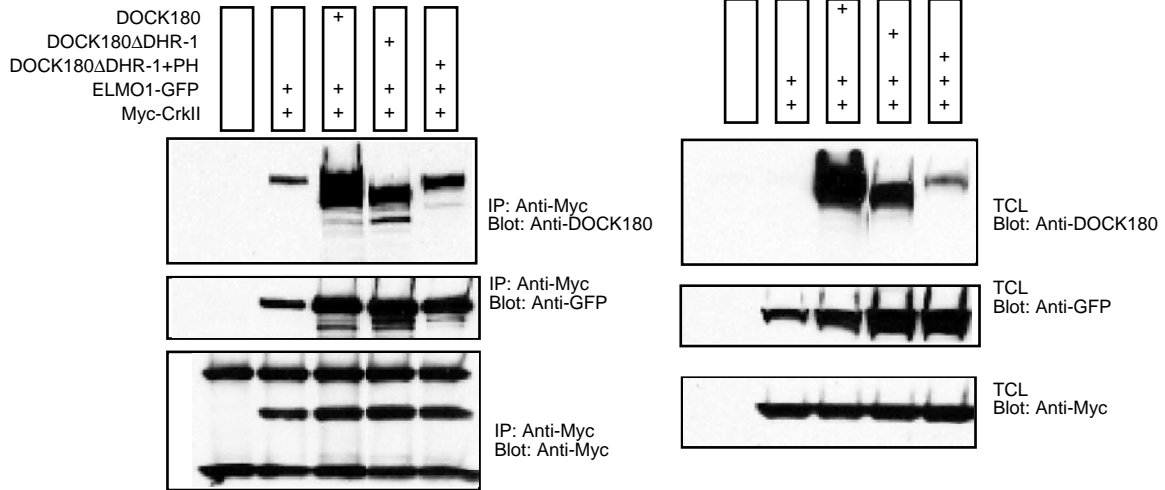

Supplement: NIHMS4865-supplement-sup4.pdf [file NIHMS4865-supplement-sup4.pdf]
